# Supplementary material for: Abiotic drivers of coastal fish community change during four decades in the Baltic Sea
Source: Oxford University Press journal article supplement (doi:10.1093/icesjms/fss072), 2012-05-14
Supplement: fss072supp.docx [file fss072supp.docx]

**Supplementary material**

This supplementary material accompanies the paper:

Olsson, J., Bergström, L., and Gårdmark, A. 2012. Abiotic drivers of coastal fish community change during four decades in the Baltic Sea. ICES Journal of Marine Science,

**Table S1**

Common, abbreviated and scientific names for all species included in the analyses. Basin and season denotes occurrence. For explanations of names of basins and seasons, see main text.

**Table S2**

Cross-correlation matrix based on r-values for the environmental variables in each data set. * denotes that the variable was redundant (VIF > 3) and excluded from the DISTLM-analyses.

|  |  |  | **Scale** |  |  |  |  |  |  |  |
| --- | --- | --- | --- | --- | --- | --- | --- | --- | --- | --- |
|  |  |  | **Local** |  |  | **Regional** |  |  |  |  |
| **Data set** | **Scale** | **Variable** | **Trl** | **Tl** | **TotN** | **T** | **S** | **DIN** | **DIP** | **pH** |
| **K Cold** | Local | Tl | 0.26 |  |  |  |  |  |  |  |
| **1976-2008** |  | TotN | 0.01 | 0.31 |  |  |  |  |  |  |
|  | Regional | T | 0.52 | 0.17 | 0.03 |  |  |  |  |  |
|  |  | S | 0.07 | -0.03 | -0.18 | 0.37 |  |  |  |  |
|  |  | DIN | -0.21 | 0.04 | 0.05 | -0.04 | -0.07 |  |  |  |
|  |  | DIP* | -0.49 | 0.02 | 0.06 | -0.15 | -0.02 | 0.83 |  |  |
|  |  | pH | -0.54 | -0.43 | -0.04 | -0.34 | -0.20 | 0.16 | 0.24 |  |
|  | Global | NAO | 0.15 | 0.35 | 0.08 | 0.06 | 0.08 | 0.22 | 0.16 | -0.29 |
| **K Warm** | Local | Tl | 0.24 |  |  |  |  |  |  |  |
| **1976-2008** |  | TotN | -0.10 | 0.12 |  |  |  |  |  |  |
|  | Regional | T | 0.30 | 0.58 | 0.03 |  |  |  |  |  |
|  |  | S | 0.02 | 0.15 | -0.18 | 0.37 |  |  |  |  |
|  |  | DIN | -0.15 | -0.24 | 0.05 | -0.04 | -0.07 |  |  |  |
|  |  | DIP* | -0.43 | -0.25 | 0.06 | -0.15 | -0.02 | 0.83 |  |  |
|  |  | pH | -0.44 | -0.26 | -0.04 | -0.34 | -0.20 | 0.16 | 0.24 |  |
|  | Global | NAO | -0.12 | -0.04 | 0.08 | 0.06 | 0.08 | 0.22 | 0.16 | -0.29 |
|  |  |  |  |  |  |  |  |  |  |  |
| **BP Cold** | Local | Tl | -0.11 |  |  |  |  |  |  |  |
| **1971-2008** |  | TotN | -0.06 | -0.03 |  |  |  |  |  |  |
|  | Regional | T | 0.02 | 0.16 | 0.54 |  |  |  |  |  |
|  |  | S | 0.34 | -0.13 | -0.05 | -0.26 |  |  |  |  |
|  |  | DIN | -0.08 | 0.02 | -0.11 | -0.06 | -0.16 |  |  |  |
|  |  | DIP | 0.03 | 0.09 | 0.15 | 0.07 | -0.10 | 0.10 |  |  |
|  |  | pH | -0.30 | -0.19 | -0.10 | -0.35 | 0.33 | -0.17 | 0.12 |  |
|  | Global | NAO | 0.04 | 0.39 | 0.16 | 0.15 | -0.12 | 0.36 | 0.52 | -0.29 |
| **BP Warm** | Local | Tl | -0.65 |  |  |  |  |  |  |  |
| **1971-2008** |  | TotN | -0.01 | -0.27 |  |  |  |  |  |  |
|  | Regional | T | -0.26 | 0.35 | -0.17 |  |  |  |  |  |
|  |  | S | 0.63 | -0.52 | -0.06 | -0.26 |  |  |  |  |
|  |  | DIN | 0.04 | 0.00 | -0.23 | -0.06 | -0.16 |  |  |  |
|  |  | DIP | -0.32 | 0.15 | -0.34 | 0.07 | -0.10 | 0.10 |  |  |
|  |  | pH | 0.04 | -0.37 | 0.26 | -0.35 | 0.33 | -0.17 | 0.12 |  |
|  | Global | NAO | 0.04 | 0.23 | -0.42 | 0.15 | -0.12 | 0.36 | 0.52 | -0.29 |
|  |  |  |  |  |  |  |  |  |  |  |
| **BoS Cold** | Local | Tl | 0.12 |  |  |  |  |  |  |  |
| **1975-2002** |  | TotN | -0.10 | 0.06 |  |  |  |  |  |  |
|  | Regional | T | -0.08 | 0.24 | -0.11 |  |  |  |  |  |
|  |  | S | 0.07 | -0.06 | -0.03 | -0.47 |  |  |  |  |
|  |  | DIN | 0.20 | 0.05 | 0.26 | 0.32 | -0.26 |  |  |  |
|  |  | DIP | -0.14 | -0.03 | 0.48 | 0.31 | -0.22 | 0.63 |  |  |
|  |  | pH | -0.30 | -0.02 | -0.04 | -0.29 | 0.65 | -0.35 | -0.23 |  |
|  | Global | NAO | -0.15 | -0.27 | 0.08 | 0.22 | -0.12 | 0.39 | 0.46 | -0.13 |
| **BoS Warm** | Local | Tl | -0.23 |  |  |  |  |  |  |  |
| **1975-2008** |  | TotN | 0.01 | -0.44 |  |  |  |  |  |  |
|  | Regional | T | -0.23 | 0.25 | -0.15 |  |  |  |  |  |
|  |  | S | 0.50 | -0.34 | 0.08 | -0.54 |  |  |  |  |
|  |  | DIN | -0.13 | 0.08 | 0.12 | 0.40 | -0.40 |  |  |  |
|  |  | DIP | -0.14 | -0.14 | 0.44 | 0.08 | 0.00 | 0.32 |  |  |
|  |  | pH | 0.45 | -0.29 | 0.06 | -0.43 | 0.72 | -0.44 | -0.01 |  |
|  | Global | NAO | -0.03 | 0.24 | 0.07 | 0.10 | -0.11 | 0.34 | 0.41 | -0.08 |

**Figure S1**

The temporal development outlined as yearly anomalies for species with a correlation > 0.2 with any of the two first ordination axes in the PCO-analyses (Figure 2, main text) and for the environmental variables included in the final models of each data set (Table 2, main text). ^ denotes a linear trend at p < 0.1, * p < 0.05, ** p < 0.01 and *** p < 0.001.

*K Cold*

**Figure S1 (cont)**

*K Warm*

**Figure S1 (cont)**

*BP Cold*

**Figure S1(cont)**

*BP Warm*

**Figure S1 (cont)**

*BoS Cold*

**Figure S1 (cont)**

*BoS Warm*
